# Supplementary material for: Genetics, Receptor Binding Property, and Transmissibility in Mammals of Naturally Isolated H9N2 Avian Influenza Viruses
Source: PubMed Central journal article supplement (PMC4239090; doi:10.1371/journal.ppat.1004508), 2014-11-20
Supplement: ppat.1004508.s001.pdf [file ppat.1004508.s001.pdf]

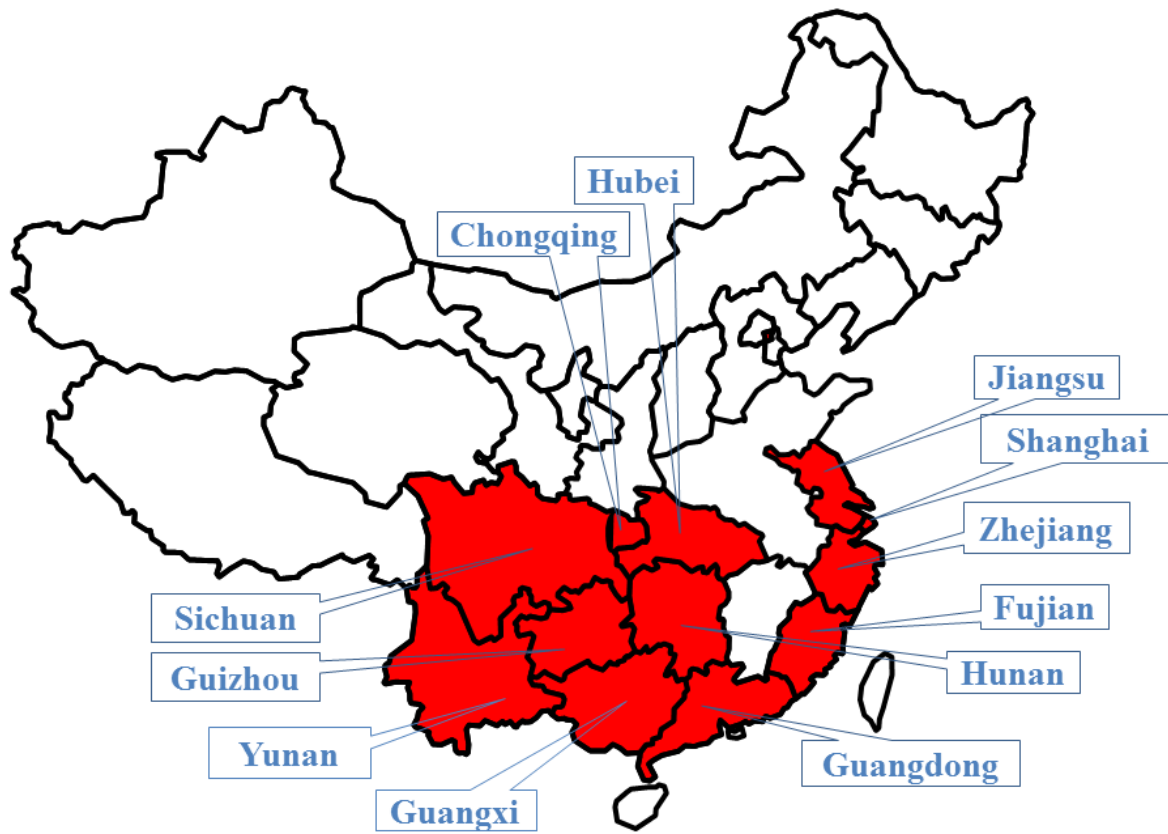

**Figure S1.** Geographic location of the H9N2 viruses analyzed in this study.
