# Supplementary material for: Genetics, Receptor Binding Property, and Transmissibility in Mammals of Naturally Isolated H9N2 Avian Influenza Viruses
Source: PubMed Central journal article supplement (PMC4239090; doi:10.1371/journal.ppat.1004508), 2014-11-20
Supplement: ppat.1004508.s003.pdf [file ppat.1004508.s003.pdf]

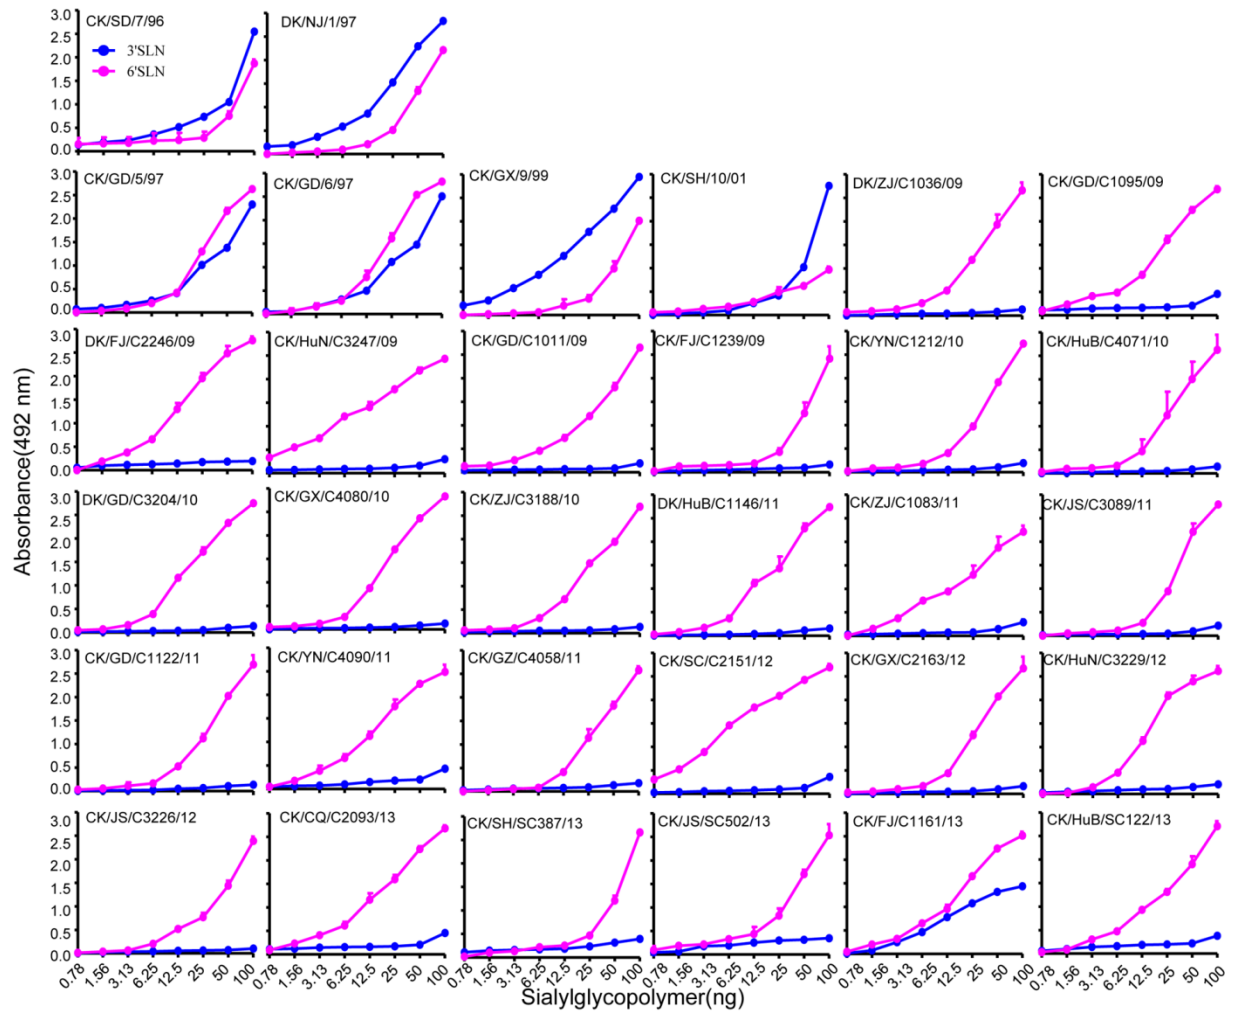

**Figure S3. Characterization of the receptor-binding properties of H9N2 viruses.** The binding of the viruses to two different biotinylated glycans ( $\alpha$ -2, 3 glycan, blue;  $\alpha$ -2, 6 glycan, pink) was tested. The data shown are the means of three repeats; the error bars indicate the standard deviations.
