# Supplementary material for: Genetics, Receptor Binding Property, and Transmissibility in Mammals of Naturally Isolated H9N2 Avian Influenza Viruses
Source: PubMed Central journal article supplement (PMC4239090; doi:10.1371/journal.ppat.1004508), 2014-11-20
Supplement: ppat.1004508.s005.pdf [file ppat.1004508.s005.pdf]

**Table S1.** Mutations detected in the H9N2 viruses that contribute to the increased binding to human-type receptors, transmission, replication, and virulence in mammals, as well as to resistance to amantadine and rimantadine<sup>a</sup>.

| Virus (Genotype)     | HA (H3 Numbering) |       |       |       | PB1   |       |       |       | PA    | M1   |       |       | M2     | NS1  |
|----------------------|-------------------|-------|-------|-------|-------|-------|-------|-------|-------|------|-------|-------|--------|------|
|                      | I155T             | H183N | A190V | Q226L | R207K | I368V | H436Y | M677T | A515T | N30D | T139A | T215A | S31N/G | P42S |
| DK/ZJ/C1036/09 (1)   | T                 | N     | A     | L     | K     | V     | Y     | T     | T     | D    | T     | A     | N      | S    |
| CK/GX/C4080/10 (1)   | T                 | N     | A     | L     | K     | V     | Y     | T     | T     | D    | T     | A     | N      | S    |
| CK/ZJ/C3188/10 (1)   | T                 | N     | V     | L     | K     | V     | Y     | T     | T     | D    | T     | A     | N      | S    |
| CK/ZJ/C1083/11 (1)   | T                 | N     | V     | L     | K     | V     | Y     | T     | T     | D    | T     | A     | N      | S    |
| CK/YN/C4090/11 (1)   | T                 | N     | V     | L     | K     | V     | Y     | T     | T     | D    | T     | A     | N      | S    |
| CK/GX/C1435/12 (1)   | T                 | N     | V     | L     | K     | V     | Y     | T     | T     | D    | T     | A     | N      | S    |
| CK/JS/C3226/12 (1)   | T                 | N     | A     | L     | K     | V     | Y     | T     | T     | D    | T     | A     | N      | S    |
| CK/SH/SC197/13 (1)   | T                 | N     | V     | L     | K     | V     | Y     | T     | T     | D    | T     | A     | N      | S    |
| DK/ZJ/C2046/12 (2)   | T                 | N     | A     | L     | K     | V     | Y     | T     | T     | D    | T     | A     | N      | S    |
| CK/JS/SC502/13 (2)   | T                 | N     | T     | L     | K     | V     | Y     | T     | T     | D    | T     | A     | N      | S    |
| CK/HuB/SC122/13 (2)  | T                 | N     | A     | L     | K     | V     | Y     | T     | T     | D    | T     | A     | N      | S    |
| CK/HuN/C3229/12 (3)  | T                 | N     | V     | L     | K     | V     | Y     | T     | T     | D    | T     | A     | N      | S    |
| CK/SH/SC387/13 (3)   | T                 | N     | T     | L     | K     | V     | Y     | T     | T     | D    | T     | A     | N      | S    |
| CK/ZJ/SC324/13 (3)   | T                 | N     | V     | L     | K     | V     | Y     | T     | T     | D    | T     | A     | N      | S    |
| CK/ZJ/C1219/10 (4)   | T                 | N     | A     | L     | K     | V     | Y     | T     | T     | D    | T     | A     | N      | S    |
| CK/JS/C4258/12 (4)   | T                 | N     | V     | L     | K     | V     | Y     | T     | T     | D    | T     | A     | N      | S    |
| CK/JS/C3089/11 (5)   | T                 | N     | A     | L     | K     | V     | Y     | T     | T     | D    | T     | A     | N      | S    |
| CK/CQ/C1258/11 (6)   | T                 | N     | A     | L     | K     | I     | Y     | T     | T     | D    | T     | A     | N      | S    |
| CK/CQ/C2093/13 (7)   | T                 | N     | A     | L     | K     | I     | Y     | T     | T     | D    | A     | A     | N      | S    |
| CK/YN/C1212/10 (8)   | T                 | N     | A     | L     | K     | V     | Y     | T     | T     | D    | T     | A     | N      | S    |
| CK/GX/C2163/12 (9)   | T                 | N     | A     | L     | K     | I     | Y     | T     | T     | D    | T     | A     | N      | S    |
| CK/SC/C2151/12 (10)  | T                 | N     | A     | L     | K     | I     | Y     | T     | T     | D    | T     | A     | N      | S    |
| DK/FJ/C2246/09 (11)  | T                 | N     | A     | L     | K     | I     | Y     | T     | T     | D    | T     | A     | N      | S    |
| CK/FJ/C1239/09 (11)  | T                 | N     | A     | L     | K     | I     | Y     | T     | T     | D    | T     | A     | S      | S    |
| DK/HuB/C1146/11 (12) | T                 | N     | A     | L     | K     | I     | Y     | T     | T     | D    | T     | A     | S      | S    |

|                      |   |   |   |   |   |   |   |   |   |   |   |   |   |   |
|----------------------|---|---|---|---|---|---|---|---|---|---|---|---|---|---|
| CK/HuB/C4196/09 (13) | T | N | V | L | K | I | Y | T | T | D | T | A | S | S |
| CK/HuN/C3247/09 (13) | T | N | A | L | K | I | Y | T | T | D | A | A | S | S |
| CK/HuB/C4071/10 (13) | T | N | A | L | K | I | Y | T | T | D | T | A | S | S |
| CK/GZ/C1011/09 (14)  | T | N | A | L | K | I | Y | T | T | D | T | A | S | S |
| CK/GD/C1095/09 (15)  | T | N | A | L | K | I | Y | T | T | D | T | A | S | S |
| CK/HuN/C4136/10 (16) | T | N | A | L | K | V | Y | T | T | D | T | A | G | S |
| DK/GD/C3204/10 (16)  | T | N | A | L | K | V | Y | T | T | D | T | A | N | S |
| CK/GD/C1122/11 (16)  | T | N | A | L | K | V | Y | T | T | D | T | A | N | S |
| CK/GZ/C4058/11 (16)  | T | N | A | L | K | V | Y | T | T | D | T | A | N | S |
| CK/FJ/S1161/13 (17)  | T | N | A | L | K | V | Y | T | T | D | T | A | N | S |
| CK/SD/7/96           | T | N | A | Q | K | V | Y | T | T | D | T | A | S | S |
| DK/NJ/1/97           | T | N | T | Q | K | V | Y | T | T | D | T | A | S | S |
| CK/GD/5/97           | T | N | V | Q | K | I | Y | T | T | D | T | A | S | S |
| CK/GD/6/97           | T | N | V | Q | K | V | Y | T | T | D | T | A | S | S |
| CK/GX/9/99           | T | N | T | Q | K | V | Y | T | T | D | A | A | S | S |
| CK/SH/10/01          | T | N | A | Q | K | V | Y | T | T | D | T | A | S | S |

<sup>a</sup>, Mutations that are conserved in the H9N2 viruses are shown in black, mutations that are not conserved in the H9N2 viruses are shown in red.
