# Supplementary material for: Genetics, Receptor Binding Property, and Transmissibility in Mammals of Naturally Isolated H9N2 Avian Influenza Viruses
Source: PubMed Central journal article supplement (PMC4239090; doi:10.1371/journal.ppat.1004508), 2014-11-20
Supplement: ppat.1004508.s006.pdf [file ppat.1004508.s006.pdf]

Table S2. Virus binding affinity to sialylglycopolymers.

| Virus               | Association constant ( $K_a$ , $\text{mg}^{-1}$ sialic acid) <sup>a,b</sup> |                 | Relative value <sup>c</sup> |
|---------------------|-----------------------------------------------------------------------------|-----------------|-----------------------------|
|                     | $\alpha$ 2,6 SA                                                             | $\alpha$ 2,3 SA |                             |
| CK/SD/7/96          | 0.73±0.32                                                                   | 2.61±2.55       | 0.28                        |
| DK/NJ/1/97          | 0.31±0.21                                                                   | 3.48±1.33       | 0.09                        |
| CK/GD/5/97          | 2.13±0.73                                                                   | 1.28±0.67       | 1.66                        |
| GD/6/97             | 2.48±0.47                                                                   | 1.32±0.58       | 1.88                        |
| CK/GX/9/99          | 0.37±0.10                                                                   | 4.54±0.21       | 0.08                        |
| CK/SH/10/01         | 0.40±0.23                                                                   | 2.19±2.11       | 0.18                        |
| DK/ZJ/C1036/09      | 2.25±0.96                                                                   | <0.01           | 225.71                      |
| CK/GX/C4080/10      | 2.92±0.73                                                                   | <0.01           | 292.92                      |
| CK/ZJ/C3188/10      | 2.39±0.49                                                                   | <0.01           | 239.10                      |
| CK/ZJ/C1083/11      | 6.30±1.23                                                                   | <0.01           | 630.65                      |
| CK/YN/C4090/11      | 6.03±0.56                                                                   | <0.01           | 603.56                      |
| CK/GX/C1435/12      | 11.22±6.49                                                                  | 0.10±0.05       | 112.17                      |
| CK/JS/C3226/12      | 1.43±0.53                                                                   | <0.01           | 143.55                      |
| CK/SH/SC197/13      | 3.69±0.00                                                                   | <0.01           | 369.47                      |
| DK/ZJ/C2046/12      | 3.93±1.05                                                                   | <0.01           | 393.22                      |
| CK/JS/SC502/13      | 1.37±0.32                                                                   | <0.01           | 137.53                      |
| CK/HuB/SC122/13     | 5.66±2.46                                                                   | <0.01           | 566.76                      |
| CK/HuN/C3229/12     | 6.72±3.32                                                                   | <0.01           | 672.81                      |
| CK/SH/SC387/13      | 1.03±0.90                                                                   | <0.01           | 103.89                      |
| CK/ZJ/SC324/13      | 2.29±0.58                                                                   | <0.01           | 229.38                      |
| CK/ZJ/C1219/10      | 3.75±0.18                                                                   | <0.01           | 375.14                      |
| CK/JS/C4258/12      | 5.85±0.61                                                                   | <0.01           | 585.47                      |
| CK/JS/C3089/11      | 2.27±1.56                                                                   | <0.01           | 227.67                      |
| CK/CQ/C1258/11      | 2.17±0.92                                                                   | <0.01           | 217.77                      |
| CK/CQ/C2093/13      | 3.74±1.08                                                                   | <0.01           | 374.07                      |
| CK/YN/C1212/10      | 1.81±0.87                                                                   | <0.01           | 181.80                      |
| CK/GX/C2163/12      | 1.60±0.20                                                                   | <0.01           | 160.21                      |
| CK/SC/C2151/12      | 11.15±2.14                                                                  | <0.01           | 1114.94                     |
| DK/FJ/C2246/09      | 7.44±2.46                                                                   | <0.01           | 744.99                      |
| CK/FJ/C1239/09      | 1.35±0.91                                                                   | <0.01           | 135.95                      |
| DK/HuB/C1146/11     | 3.03±0.52                                                                   | <0.01           | 303.93                      |
| CK/HuB/C4196/09     | 2.88±0.86                                                                   | 0.06±0.04       | 48.02                       |
| CK/HuN/C3247/09     | 10.80±1.69                                                                  | <0.01           | 1079.92                     |
| CK/HuB/C4071/10     | 2.06±0.50                                                                   | <0.01           | 206.34                      |
| CK/GD/C1011/09      | 2.29±0.67                                                                   | <0.01           | 229.11                      |
| CK/GD/C1095/09      | 11.11±5.27                                                                  | <0.01           | 1111.47                     |
| CK/HuN/C4136/10     | 2.07±0.55                                                                   | <0.01           | 207.18                      |
| DK/GD/C3204/10      | 3.79±0.63                                                                   | <0.01           | 379.13                      |
| CK/GD/C1122/11      | 1.36±0.68                                                                   | <0.01           | 136.91                      |
| CK/GZ/C4058/11      | 2.56±0.26                                                                   | <0.01           | 256.84                      |
| CK/FJ/C1161/13      | 2.38±0.99                                                                   | 1.70±0.63       | 1.40                        |
| rCK/GX/9/99         | 0.27±0.16                                                                   | 7.54±0.57       | 0.04                        |
| rCK/GX/9/99-HAT155I | <0.01                                                                       | 12.33±1.02      | <0.01                       |
| rCK/GX/9/99-HAN183H | 1.32±0.26                                                                   | 11.88±2.07      | 0.11                        |

<sup>a</sup> Dose-response curves of virus binding to sialic acid (Sia) were analyzed by using a single site binding algorithm and curve fitting by GraphPad Prism to determine the association constant values ( $K_a$ ).

<sup>b</sup> Each value is the mean  $\pm$  SD of three experiments, which were each performed in triplicate.

<sup>c</sup>  $K_a$  ( $\alpha 2, 6$  Sia)/ $K_a$  ( $\alpha 2, 3$  Sia), higher relative values reflect higher binding specificity to  $\alpha 2,6$  SA.
