# Supplementary material for: Genetics, Receptor Binding Property, and Transmissibility in Mammals of Naturally Isolated H9N2 Avian Influenza Viruses
Source: PubMed Central journal article supplement (PMC4239090; doi:10.1371/journal.ppat.1004508), 2014-11-20
Supplement: ppat.1004508.s007.pdf [file ppat.1004508.s007.pdf]

Table S3. Virus selection scenarios for the ferret study.

| Genotype                                            | 1 | 2 | 3 | 4 | 5 | 6 | 7 | 8 | 9 | 10 | 11 | 12 | 13 | 14 | 15 | 16 | 17 |
|-----------------------------------------------------|---|---|---|---|---|---|---|---|---|----|----|----|----|----|----|----|----|
| Number of viruses                                   | 8 | 3 | 3 | 2 | 1 | 1 | 1 | 1 | 1 | 1  | 2  | 1  | 3  | 1  | 1  | 4  | 1  |
| Number of Provinces in which the virus was detected | 6 | 3 | 3 | 2 | 1 | 1 | 1 | 1 | 1 | 1  | 1  | 1  | 2  | 1  | 1  | 3  | 1  |
| Number of strains selected for the ferret study     | 2 | 1 | 1 | 2 | 0 | 1 | 0 | 0 | 0 | 0  | 0  | 0  | 1  | 0  | 0  | 1  | 0  |
