# Supplementary material for: Genetics, Receptor Binding Property, and Transmissibility in Mammals of Naturally Isolated H9N2 Avian Influenza Viruses
Source: PubMed Central journal article supplement (PMC4239090; doi:10.1371/journal.ppat.1004508), 2014-11-20
Supplement: ppat.1004508.s008.pdf [file ppat.1004508.s008.pdf]

**Table S4.** The body temperature increase and body weight loss of each of the ferrets inoculated with or exposed to the different H9N2 influenza viruses.

| Virus<br>(Genotype)         | Body temperature increase (°C)  |                                 | Body weight loss (%)            |                           |
|-----------------------------|---------------------------------|---------------------------------|---------------------------------|---------------------------|
|                             | Inoculated                      | Exposed                         | Inoculated                      | Exposed                   |
| CK/GX/C1435/12 (1)          | 1.6, 2, 1.2                     | 3.4, 1.6, 1.6                   | 1.8, 7.8, 7.9                   | 3.2, 0, 5.2               |
| CK/SH/SC197/13 (1)          | 0.6, 0.8, 1.5                   | 0.3, 1.3, 0.1                   | 0.6, 3.1, 0.4                   | 0, 3.3, 0                 |
| DK/ZJ/C2046/12 (2)          | 2.4, 1.9, 1.8                   | 0, 0, 0                         | 5.2, 3.3, 3.6                   | 0, 2.9, 0                 |
| CK/ZJ/SC324/13 (3)          | 0.5, 1.1, 1.7                   | 0.5, 0.1, 1.3                   | 0.2, 2.6, 2.6                   | 0, 0, 0.9                 |
| CK/ZJ/C1219/10 (4)          | 0.9, 0.7, 0.5                   | 0.2, 1.5, 0                     | 1.2, 1.4, 0                     | 0, 1.8, 0                 |
| CK/JS/C4258/12 (4)          | 1.9, 1.2, 1.5,<br>0.7, 0.7, 0.9 | 0.7, 1.5, 0.5,<br>1.3, 2.4, 0.5 | 0.8, 2.4, 3.3,<br>2.5, 1.5, 3.3 | 6.3, 8.8, 3,<br>0, 1.2, 0 |
| CK/CQ/C1258/11 (6)          | 1.2, 2.5, 2.2                   | 0, 0.5, 0                       | 1.3, 1.8, 2.7                   | 0, 0.3, 0                 |
| CK/HuB/C4196/09 (13)        | 1.2, 0.8, 0.7                   | 0, 0, 0                         | 0.5, 1.6, 3.9                   | 0, 0, 0                   |
| CK/HuN/C4136/10 (16)        | 0.8, 1.1, 0.6                   | 0, 0, 0                         | 1.7, 4.2, 3.1                   | 0, 0, 0.5                 |
| CK/ZJ/C1219/10-PB2/627K (4) | 0.8, 1.4, 1.1                   | 0.1, 1.3, 0.9                   | 1.9, 3.9, 6.4                   | 0, 4.5, 1.1               |
| CK/ZJ/C1219/10-PB2/701N (4) | 1.2, 0.7, 1                     | 1.3, 1.1, 0                     | 0, 1.9, 7.2                     | 2.3, 4.4, 0               |
