# Supplementary material for: Genetics, Receptor Binding Property, and Transmissibility in Mammals of Naturally Isolated H9N2 Avian Influenza Viruses
Source: PubMed Central journal article supplement (PMC4239090; doi:10.1371/journal.ppat.1004508), 2014-11-20
Supplement: ppat.1004508.s009.pdf [file ppat.1004508.s009.pdf]

**Table S5.** Assessment of the presence of the 627K and 701N mutations in the PB2 segment of stock viruses and viruses recovered from the nasal washes of H9N2 influenza virus-infected or -exposed ferrets by use of deep sequencing.

| Virus           | Stock virus |      | Virus recovered from animal on different days post-inoculation (p.i.) |           |       |           |       |           |       |
|-----------------|-------------|------|-----------------------------------------------------------------------|-----------|-------|-----------|-------|-----------|-------|
|                 |             |      | Animal pair                                                           | Day 2 p.i |       | Day 4 p.i |       | Day 6 p.i |       |
|                 | 627K        | 701N |                                                                       | 627K      | 701N  | 627K      | 701N  | 627K      | 701N  |
| CK/GX/C1435/12  | 0%          | 0%   | 3                                                                     | 13.1%     | 25.9% | ND        | ND    | ND        | ND    |
| CK/SH/SC197/13  | 0%          | 0%   | 2                                                                     | ND        | ND    | ND        | ND    | 0%        | 0%    |
| DK/ZJ/C2046/12  | 0%          | 0%   | 2                                                                     | ND        | ND    | ND        | ND    | 0%        | 0%    |
| CK/ZJ/SC324/13  | 0%          | 0%   | 3                                                                     | ND        | ND    | ND        | ND    | 0%        | 0%    |
| CK/ZJ/C1219/10  | 0%          | 0%   | 1                                                                     | ND        | ND    | ND        | ND    | 5.1%      | 23.5% |
| CK/JS/C4258/12  | 0%          | 0%   | 3                                                                     | 0%        | 7.5%  | ND        | ND    | ND        | ND    |
| CK/CQ/C1258/11  | 0%          | 0%   | 1                                                                     | ND        | ND    | ND        | ND    | 0%        | 0%    |
| CK/HuB/C4196/09 | 0%          | 0%   | 3                                                                     | ND        | ND    | 0%        | 28.6% | ND        | ND    |
| CK/HuN/C4136/10 | 0%          | 0%   | 1                                                                     | ND        | ND    | ND        | ND    | 0%        | 41.3% |
